# Supplementary material for: mRNA-LNP COVID-19 Vaccine Lipids Induce Complement Activation and Production of Proinflammatory Cytokines: Mechanisms, Effects of Complement Inhibitors, and Relevance to Adverse Reactions
Source: MDPI journal article supplement (doi:10.3390/ijms25073595), 2024-03-22
Supplement: s1 [file s1]

**Table S1.** Lipid composition of Comirnaty and Doxebo

| Comirnaty*                     |                                                                          |       |      | Doxebo**                                                                                     |       |     | Dox/CMT    |
|--------------------------------|--------------------------------------------------------------------------|-------|------|----------------------------------------------------------------------------------------------|-------|-----|------------|
|                                | Lipid                                                                    | mg/mL | %    | Lipid                                                                                        | mg/mL | %   |            |
| Ionizable lipid (ALC-0315)     | ((4-hydroxybutyl) azanediyl) bis (hexane-6,1-diyl)bis(2-hexyldecanoate)) | 1.43  | 55.8 | none                                                                                         | 0     | 0   |            |
| Phospholipid                   | 1,2-distearoyl-sn-glycero-3-phosphocholine                               | 0.3   | 11.7 | Fully hydrogenated soy phosphatidylcholine                                                   | 9.58  | 60  | 5.1        |
| Cholesterol                    | Cholest-5-en-3 $\beta$ -ol                                               | 0.67  | 26   | Cholest-5-en-3 $\beta$ -ol                                                                   | 3.19  | 20  | 0.8        |
| PEGylated lipid (ALC-0159)     | (2-((polyethylene glycol)-2000)-N,N-ditetradecylacetamide))              | 0.17  | 6.5  | N-(carbonyl-methoxypolyethylene glycol 2000)-1,2-distearoyl-sn-glycero-3-phosphoethanolamine | 3.19  | 20  | 3.1        |
| Total                          |                                                                          | 2.57  | 100  |                                                                                              | 15.96 | 100 | <b>6.2</b> |
| Membrane forming phospholipids |                                                                          |       | 18   |                                                                                              |       | 80  | <b>4.4</b> |

\*Data from Ref. 110. \*\*, Data based on the lipid composition of Doxil<sup>108</sup>

**Table S2.** SARS-CoV-2 mRNA does not activate human complement

|                | C4d (µg/ml) | Bb (µg/ml) | sC5b-9 (µg/ml) |
|----------------|-------------|------------|----------------|
| PBS            | 2.6         | 10         | 2.6            |
| Comirnaty      | 5.1         | 17.2       | 5.5            |
| SARS-CoV mRNA* | 2.7         | 9.6        | 1.7            |
| Zymosan        | 8.6         | 47.1       | 142.2          |

Experiments conducted in a serum different from those applied in Figure 4. All experimental details are the same as described for Figure 4. \*, 20 µg/mL

**Table S3.** CD40L (moCD40L gene) mRNA sequence, 1,200 nt

```

AGGCCGGCGGGTTTCTGACATCCGGCGGGTTTCTGACATCCGGCGGGTTTCTGACATCCGGCGGGTTTCTGACAT
CCGGCGGGTTTCTGACATCCGGCGGGTTTCTGACATCCGGCGGGTTTCTGACATCCGGCGGGTTTCTGACATCCG
GCGGGTTTCTGACATCCGGCGGGTTTCTGACATTACAACCAGGCCTCCACAACCATGGTCGAGACATACAGCCA
GCCCAGCCCCAGAAGTGTGGCCACAGGCCTGCCCCGCCAGCATGAAAATCTTTATGTATCTGCTGACCGTGTTCCT
GATCACCCAGATGATCGGCAGCGTGCTGTTCCGGCTGTATCTGCACAGACGGCTGGACAAGGTGGAGGAAGAAG
TGAATCTGCACGAGGACTTCGTGTTTCATCAAGAAGCTGAAGCGCTGCAACAAGGGCGAGGGCAGCCTGAGCCT
GCTGAACTGCGAGGAAATGAGAAGGCAGTTCGAGGACCTGGTGAAGGACATCACCTGAACAAAGAGGAAAA
GAAAGAAAACAGCTTCGAGATGCAGAGAGGCGACGAAGATCCTCAGATCGCAGCCCACGTGGTGTCTGAGGCC
AACAGCAACGCCGCCAGCGTGCTGCAGTGGGCCAAGAAAGGCTACTACACCATGAAGTCCAACCTGGTGATGC
TGGAAAACGGCAAGCAGCTGACCGTGAAGAGAGAAGGCCTGTACTACGTGTACACCCAGGTGACATTCTGCAG
CAACAGAGAGCCCAGCAGCCAGAGGCCTTTCATCGTGGGCCTGTGGCTGAAGCCTAGCAGCGGCAGCGAGAGA
ATCCTGCTGAAGGCCGCCAACACCCACAGCAGCAGCCAGCTGTGCGAGCAGCAGTCTGTGCACCTGGGCGGCG
TGTTCGAACTGCAGGCAGGCGCCAGCGTGTTCTGTGAACGTGACCGAGGCCAGCCAGGTGATCCACAGAGTGGG
CTTCAGCAGCTTCGGCCTCCTGAAGCTGTAAGTGTGAGTGTGTTGGCTGGGTTTTTCCTTGTTTCGCACCGGACACCT
CCAGTGACCAGACGGCAAGGTTTTTATCCCAGTGTATATTGTCGACAAAAAAAAAAAAAAAAAAAAAAAAAAAAA
AAAAAAAAAAAAAAAAAAAAAAAAAAAAAAAAAAAAAAAAAAAAAAAAAAAAAAAAAAAAAAAAAAAAAAAAAAAA
AAAAAAAAAAAAAAAAAAAAAAAAAAAAAAAAAAAA

```

\*batch: RG-mRNA-moCD40L-200806)-N1UCC-Si

**Table S4.** Luciferase (rstsFluc gene) mRNA sequence (1,450 nt)

```

AGGCCGGCGGGTTTCTGACATCCGGCGGGTTTCTGACATCCGGCGGGTTTCTGACATCCGGCGGGTTTCTGACATCCG
CCGGCGGGTTTCTGACATCCGGCGGGTTTCTGACATCCGGCGGGTTTCTGACATCCGGCGGGTTTCTGACATCCG
GCGGGTTTCTGACATCCGGCGGGTTTCTGACATTACAACCAGGCCTCCACAACCATGGAAGACGCCAAAAACA
TAAAGAAAGGCCCGGCGCCATTCTATCCTCTAGAGGATGGAACCGCTGGAGAGCAACTGCATAAGGCTATGAAG
AGATACGCCCTGGTTCCTGGAACAATTGCTTTTACAGATGCACATATCGAGGTGAACATCACGTACGCGGAATAC
TTCGAAATGTCCGTTCCGTTGGCAGAAGCTATGAAACGATATGGGCTGAATACAAATCACAGAATCGTCGTATGC
AGTGAAAACCTCTCTCAATTCTTATGCCGGTGTGGGCGCGTTATTATCGGAGTTGCAGTTGCGCCCGCGAACG
ACATTTATAATGAACGTGAATTGCTCAACAGTATGAACATTTGCGAGCCTACCGTAGTGTGTTTCCAAAAAGGG
GTTGCAAAAAATTTGAACGTGCAAAAAAATTACCAATAATCCAGAAAATTATTATCATGGATTCTAAACGGA
TTACCAGGGATTTCAGTCGATGTACACGTTTCGTACATCTCATCTACCTCCCGGTTTTAATGAATACGATTTTGTAC
CAGAGTCCTTTGATCGTGACAAAACAATTGCACTGATAATGAATTCCTCTGGATCTACTGGGTTACCTAAGGGTGT
GGCCCTTCCGCATAGAGCTCTCTGCGTCAGATTCTCGCACGCCAGAGATCCAATTTTGGCAATCAAATCGCTCCG
GATACTGCGATTTTAAAGTGTGTTCCATTCCATCACGGTTTGGAAATGTTTACTACACTCGGATATTGATATGTGA
TTTCGAGTCGTCTTAATGTATAGATTGAAGAAGAGCTGTTTTACGATCCCTTCAGGATTACAAAATTCAAACCTGC
GTTACTAGTACCAACCCTATTTTCATTCTTGGCCAAAAGTACTCTGATTGACAAATACGATTTATCTAATTTACACG
AAATTGCTTCTGGGGGCGCACCTCTTTCGAAAGAAGTCGGGGGAAGCGGTTGCAAAACGCTTCCATCTTCCAGGG
ATACGACAAGGATATGGGCTCACTGAGACTACTAGTGCTATTCTGATTACACCAAGGGGGATGATAAACCGGGC
GCGGTTCGGTAAAGTTGTTCCATTTTTGAAGCGAAGGTTGTGGATCTGGATACCGGGAAAACGCTGGGCGTTAAT
CAGAGAGGCGAATTATGTGTCAGAGGACCTATGATTATGTCCGTTATGTAAACAATCCGGAAGCGACCAACGCC
TTGATTGACAAGGATGGATGGCTACATTCTGGAGACATAGCTTACTGGGACGAAGACGAACACTTCTTCATAGTT
GACCGCTTGAAGTCTTTAATTAAATACAAAGGATATCAGGTGGCCCCCGCTGAATTGGAATCGATATTGTTACAAC
ACCCCAACATCTTCGACGCGGGCGTGGCTGGTCTTCCCGACGATGACGCCGGTGAACCTCCCGCCGCGCTTGTG
TTTTGGAGCACGAAAAGACGATGACTGAAAAAGAGATCGTGGATTACGTCGCCAGTCAAGTAACAACCGCGAA
AAAGTTGCGCGGAGGAGTTGTGTTTGTGGACGAAGTACCGAAAGGTTTACCGGAAAACTCGACGCAAGAAAA
ATCAGAGAGATCCTCATAAAGGCCAAGAAGGGCGGAAAGTCCAAATTGTAACCTCGAGTGTGTTGGCTGGGTTTTT
CCTTGTTTCGACCGGACACCTCCAGTGACCAGACGGCAAGGTTTTATCCCAGTGTATATTGTCGACAAAAAAA
AAAAAAAAAAAAAAAAAAAAAAAAAAAAAAAAAAAAAAAAAAAAAAAAAAAAAAAAAAAAAAAAAAAAAAAAAAAA
AAAAAAAAAAAAAAAAAAAAAAAAAAAAAAAAAAAAAAAAAAAAAAAAAAAAAAAAAAAAAAAAAAAAAAAAAAAA

```

\*batch: RG-mRNA-pETRCC-tsrsfluc\_200623-N1UCC\_Si).

**Table S5.** Cre-recombinase (Cre) gene mRNA sequence (2,086 nt)\*

```

AGGCCGGCGGGTTTCTGACATCCGGCGGGTTTCTGACATCCGGCGGGTTTCTGACATCCGGCGGGTTTCTGACAT
CCGGCGGGTTTCTGACATCCGGCGGGTTTCTGACATCCGGCGGGTTTCTGACATCCGGCGGGTTTCTGACATCCG
GCGGGTTTCTGACATCCGGCGGGTTTCTGACATTACAACCAGGCCTCCACAACCATGTCTAACTTGTGACTGTT
CATCAGAAATCTTCTGCCTTGCCCGTAGATGCTACAAGTGACGAAGTACGGAAGAATCTCATGGATATGTTTCGA
GATAGACAAGCTTTTTCAGAGCATACATGGAAGATGCTGTTGTCTGTGTGCCGAAGCTGGGCTGCTTGGTGTA
TTGAATAACAGGAAATGGTTTCTGCAGAACCTGAAGATGTACGGGACTATCTGCTGTATCTGCAAGCTAGAGGA
CTTGCCGTCAAGACAATCCAGCAACATCTCGGACAACCTGAATATGTTGCATAGAAGATCCGGCCTGCCTCGGCCA
AGTGACTCAAACGCTGTGTCACCTGGTGATGCGAAGGATACGGAAGAAAATGTAGACGCCGGGAAAGGGCTA
AACAAGCTTTGGCTTTCGAACGAACTGACTTTGATCAGGTTAGGTCCTTGATGGAGAACTCTGACCGATGTCAAG
ACATCAGAAATCTCGCCTTCTGGGAATTGCCTATAACACATTGCTGAGAATTGCTGAAATAGCAAGGATAAGAG
TTAAAGACATCAGCAGGACTGATGGCGGCAGGATGCTCATTACATTGGGCGCACTAAGACTCTCGTCTCTACTG
CTGGCGTCGAAAAAGCTTTGTCTCTCGGTGTCACTAACTCGTCGAGCGCTGGATCTCTGTTTCTGGTGTGCTGA
CGACCCCAACAACCTACTTGTGTTTGGCGCTGAGGAAGAACGGGGTTGCCGCCCCAGTGCTACATCTCAACTGTC
AACCCGAGCACTCGAAGGAATCTTCGAGGCTACACACCGATTGATATACGGGGCTAAGGATGATAGTGGGCAGC
GGTATCTGGCTTGGAGTGGGCATTCTGCTCGAGTTGGTGCAGCACGAGACATGGCCCGAGCCGGCGTGTCAATAC
CCGAAATAATGCAGGCTGGAGGATGGACTAACGTGAATATTGTTATGAATTATTCGCAACCTGGATAGTGAGAC
TGGTGCAATGGTACGGTTGCTCGAAGATGGTGACTAACTCGAGTGTGTTTGGCTGGGTTTTCTTGTTCGCACCGG
ACACCTCCAGTGACCAGACGGCAAGGTTTTATCCCAAGTGATATTGTGACAAAAAAAAAAAAAAAAAAAAAAAAA
AAAAAAAAAAAAAAAAAAAAAAAAAAAAAAAAAAAAAAAAAAAAAAAAAAAAAAAAAAAAAAAAAAAAAAAAA
AAAAAAAAAAAAAAAAAAAAAAAAAAAAAAAAAAAAAAAAAAAAAAAAAAAAAAAAAAAAAAAAAAAAAAAAA

```

\*batch: RG-mRNA-pETRCC-Cre-200723\_N1UCC\_Si)
